# Supplementary material for: Association of a Fasting Glucose Genetic Risk Score With Subclinical Atherosclerosis: The Atherosclerosis Risk in Communities (ARIC) Study
Source: PubMed Central journal article supplement — Diabetes. 2010 Oct 29;60(1):331–5. doi: 10.2337/db10-0839 (PMC3012190; doi:10.2337/db10-0839), 2010-10-29

## Supplementary Tables and Figures

**Supplementary Table 1.** Individual SNPs in the fasting glucose genetic risk score and their association with fasting glucose

| SNP        | Gene region    | risk allele | other allele | $\beta$ per risk allele | risk allele frequency | % additional variance in glucose explained by SNP* |
|------------|----------------|-------------|--------------|-------------------------|-----------------------|----------------------------------------------------|
| rs780094   | <i>GCKR</i>    | C           | T            | .0463 mmol/L            | .603                  | 0.38                                               |
| rs560887   | <i>G6PC2</i>   | C           | T            | .0685 mmol/L            | .704                  | 0.84                                               |
| rs4607517  | <i>GCK</i>     | A           | G            | .0673 mmol/L            | .172                  | 0.51                                               |
| rs13266634 | <i>SLC30A8</i> | C           | T            | .0433 mmol/L            | .684                  | 0.34                                               |
| rs10830963 | <i>MTNR1B</i>  | G           | C            | .0796 mmol/L            | .278                  | 0.86                                               |

\*after adjustment for age, sex, and study center

**Supplementary Table 2.** Associations of intima-media thickness (IMT) with individual SNPs used to construct the fasting glucose genetic risk score

| SNP        | <i>Linear regression adjusted for age, sex, and study center</i> |         | <i>Linear regression models additional adjusted for baseline fasting glucose</i> |         |
|------------|------------------------------------------------------------------|---------|----------------------------------------------------------------------------------|---------|
|            | $\beta^*$ (SE) for association with IMT (mm)                     | p-value | $\beta^*$ (SE) for association with IMT (mm)                                     | p-value |
| rs10830963 | .0026 (.0030)                                                    | .38     | .0011(.0030)                                                                     | .73     |
| rs560887   | .0080 (.0029)                                                    | .0055   | .0066 (.0029)                                                                    | .022    |
| rs4607517  | .0068 (.0035)                                                    | .052    | .0055 (.0035)                                                                    | .12     |
| rs13266634 | .0014 (.0028)                                                    | .49     | .0005 (.0028)                                                                    | .85     |
| rs780094   | -.0020 (.0027)                                                   | .46     | -.0029 (.0027)                                                                   | .27     |

\* *linear regression. Betas represent a 1 allele increase in the risk (glucose-raising) allele*

Supplementary Figure 1 (A-E). Observed vs. expected associations between the fasting glucose genetic risk score (FGGRS) and intima-media thickness (IMT)

Associations determined from observed regression equations are described in black. All regressions adjusted for age, sex, and center. Predicted associations are described in gray.

A) rs10839063

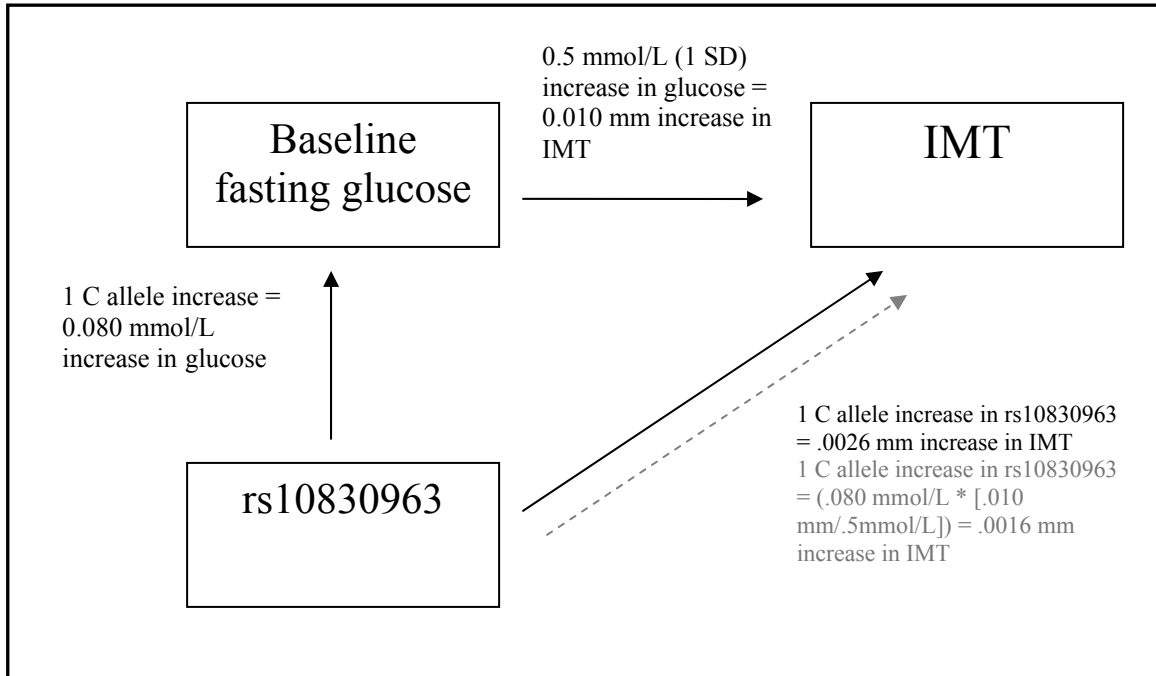

**B) rs560887**

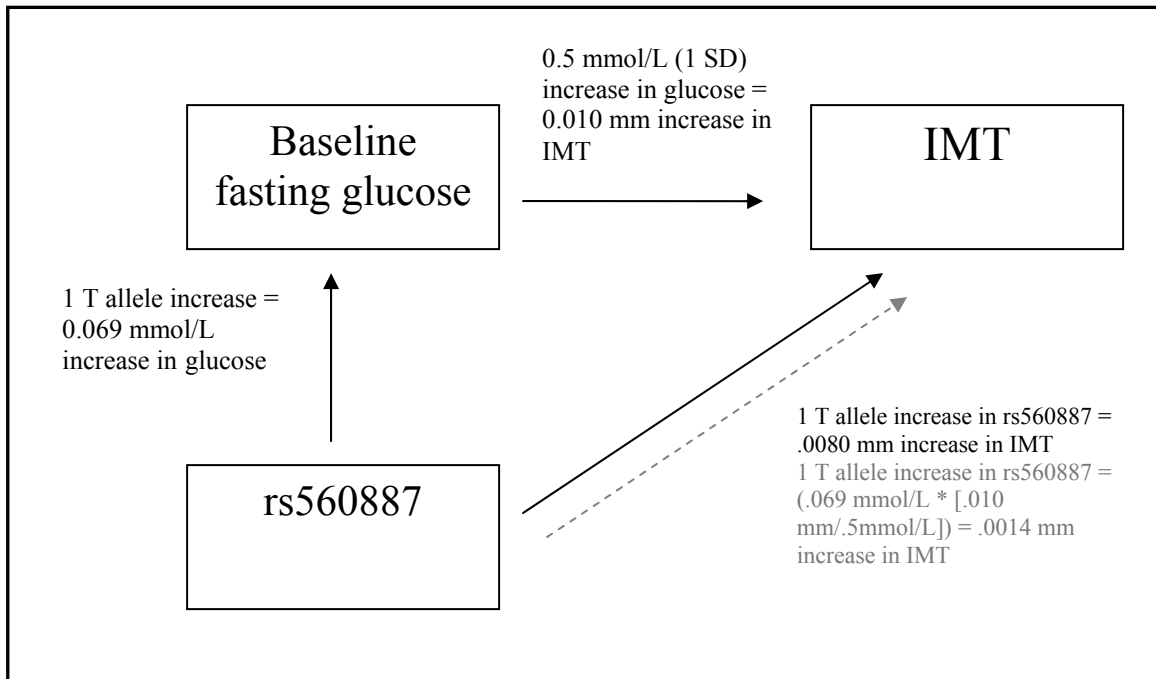

**C) rs4607517**

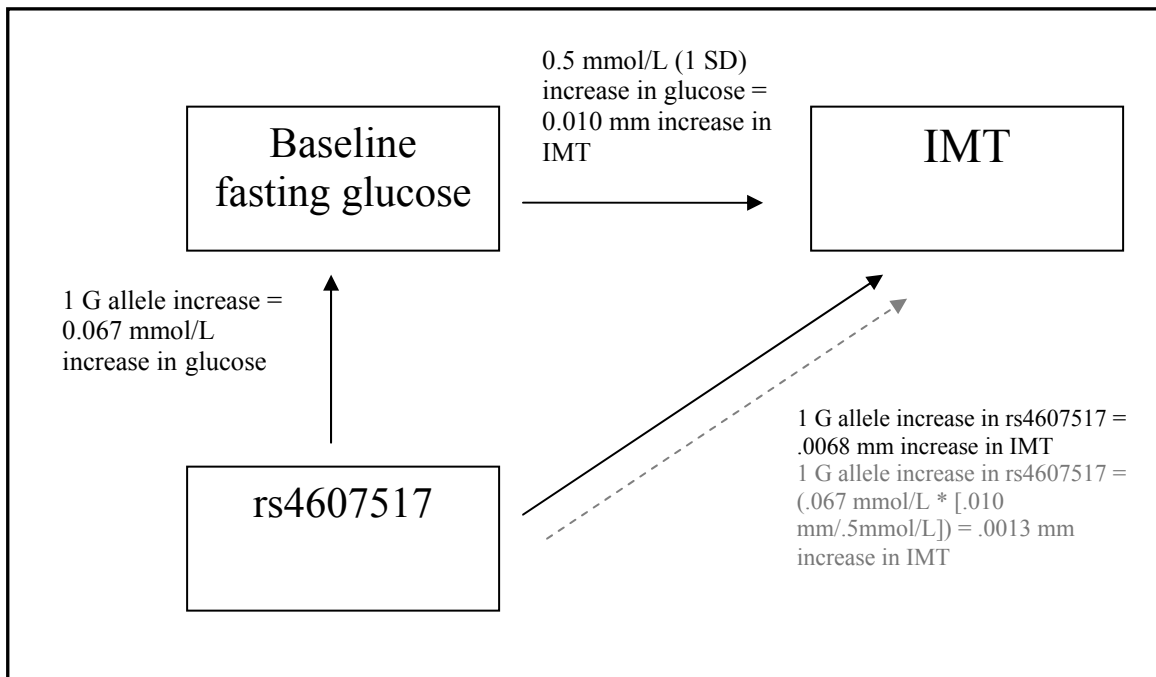

**D) rs13266634**

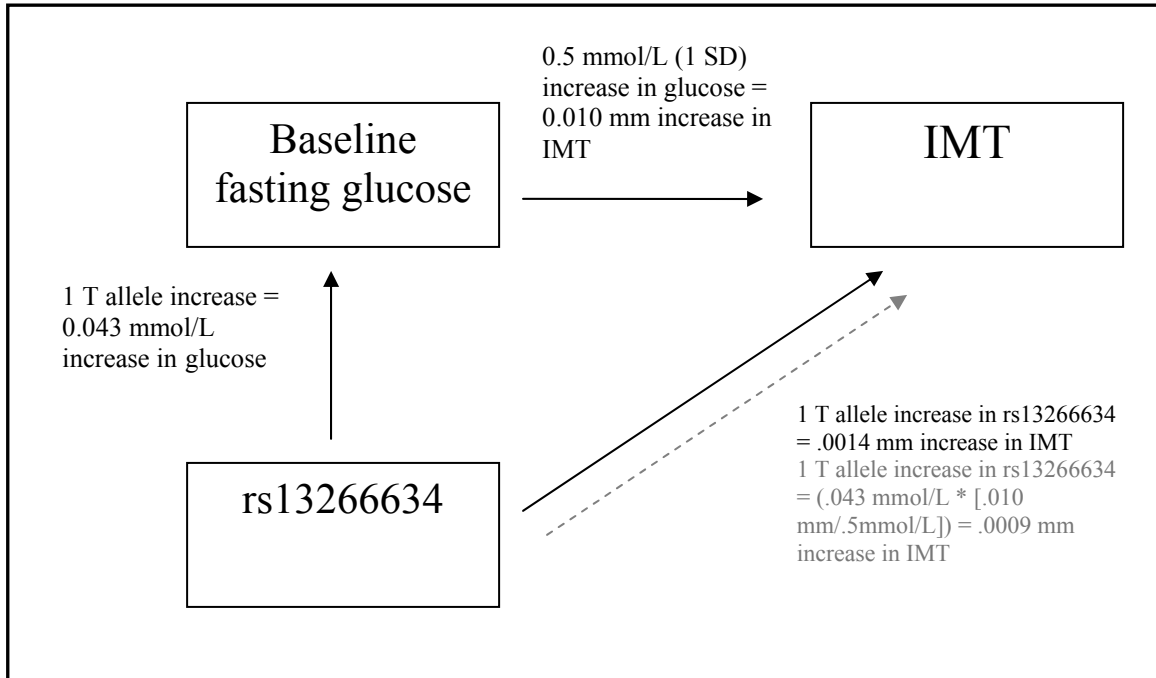

**E) rs780094**

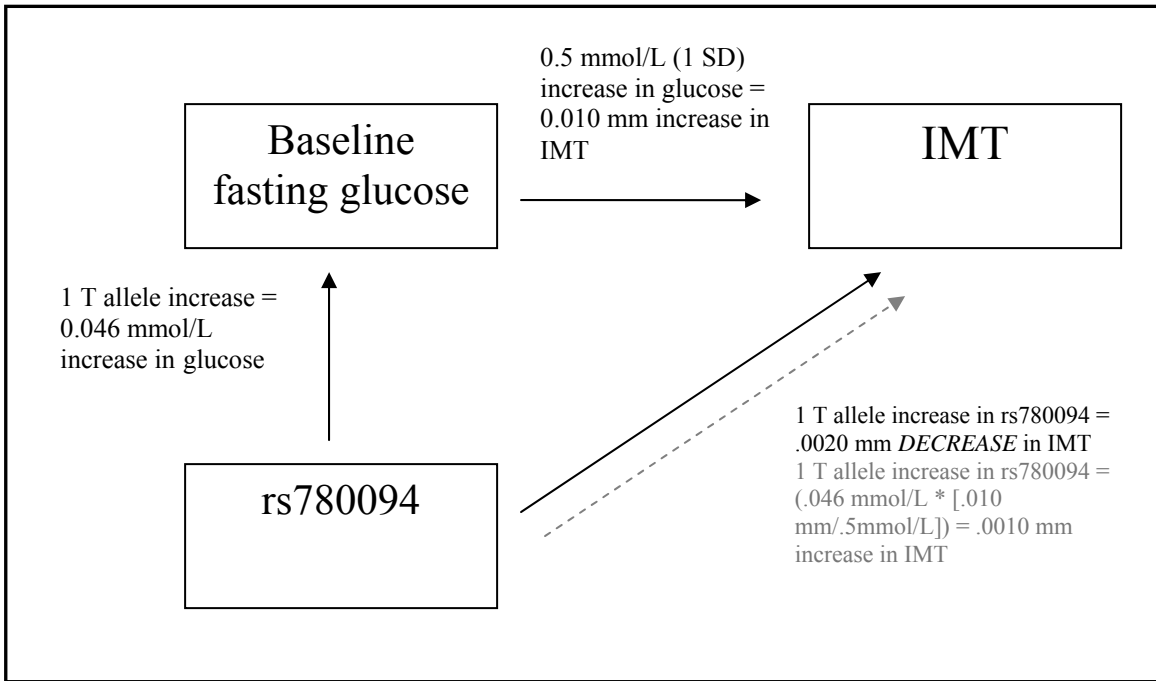

Supplement: supp_db10-0839_db100839nlineappendix.pdf [file supp_db10-0839_db100839nlineappendix.pdf]
